# Supplementary material
Source: JCI journal article supplement (doi:10.1172/jci197941)

# Figure 1F

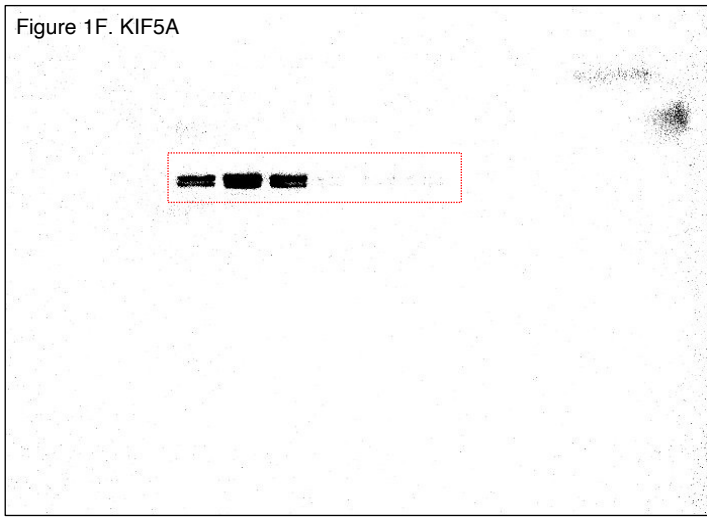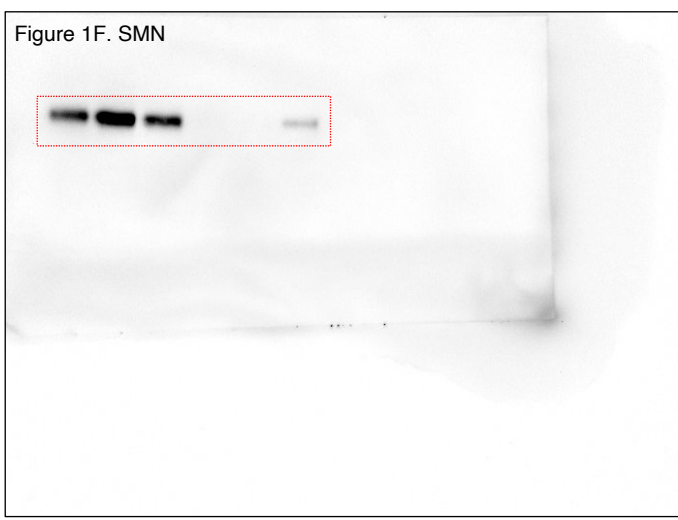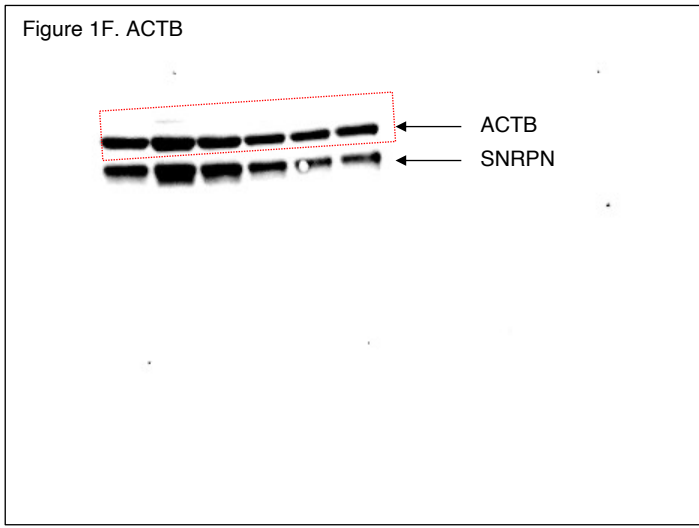

1. Stripping with Restore™ Western Blot Stripping Buffer Thermo Scientific™ 21059 10min
2. Blocking with 5% skim-milk 1hr at RT
3. anti-SNRPN antibody (Proteintech 11070-1-AP)

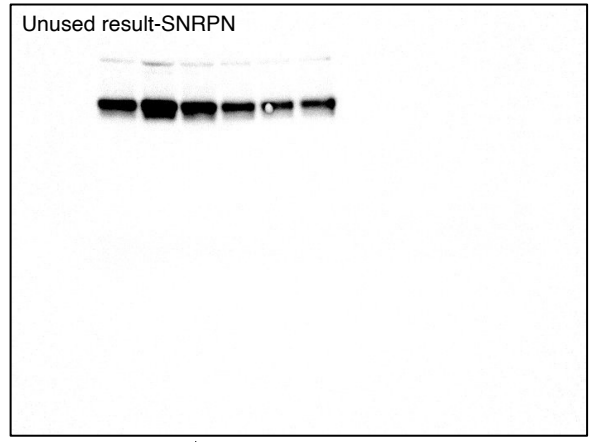

1. Stripping with Restore™ Western Blot Stripping Buffer Thermo Scientific™ 21059 10min
2. Blocking with 5% skim-milk 1hr at RT
3. anti-ACTB

# Figure 1H

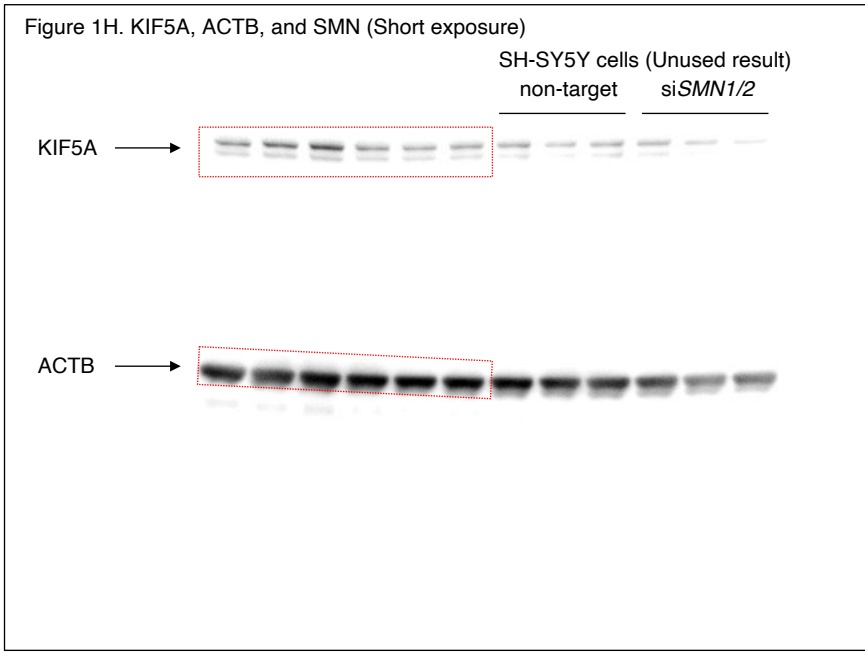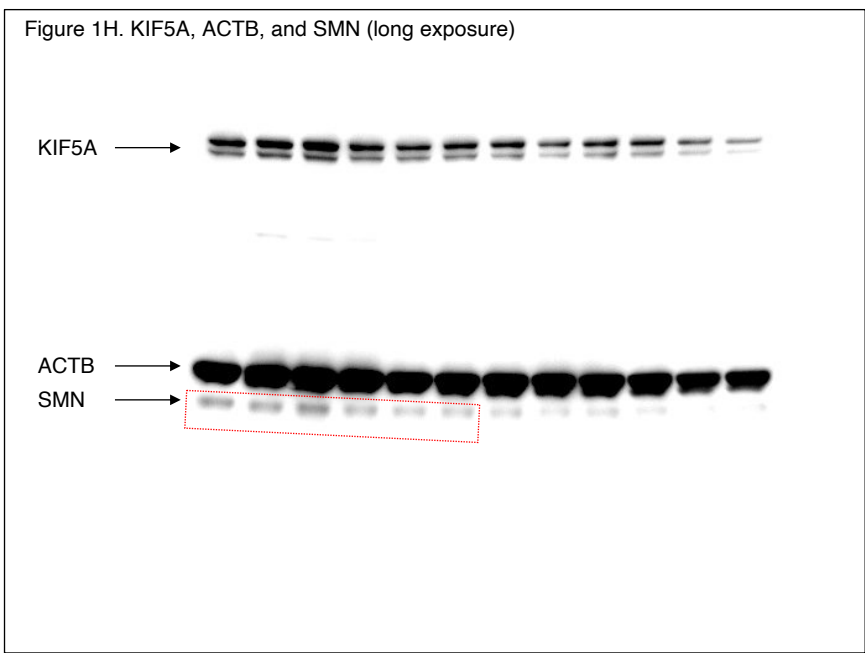

Figure 3E and Supplemental Figure 4B

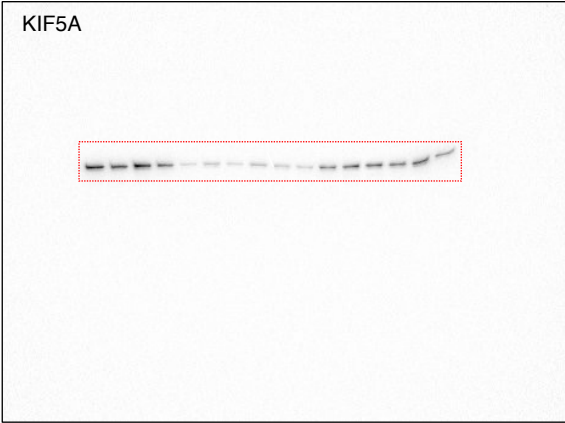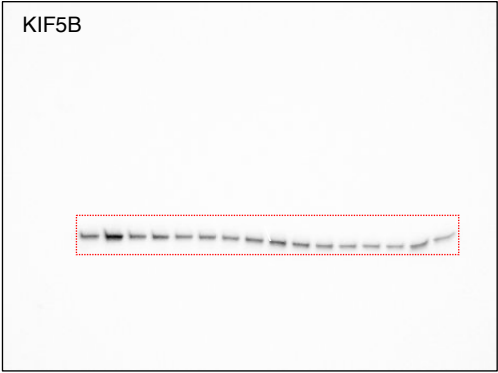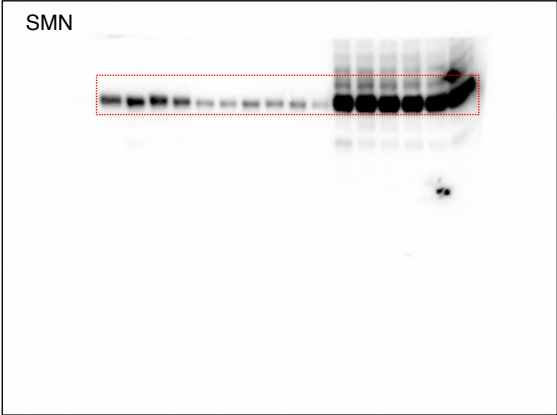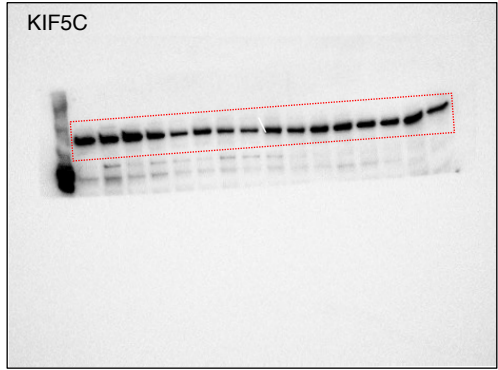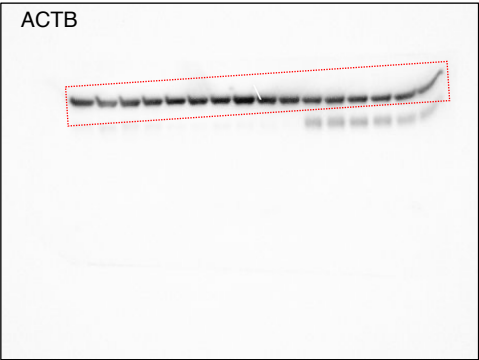

# Figure 3H and Supplemental Figure 4F

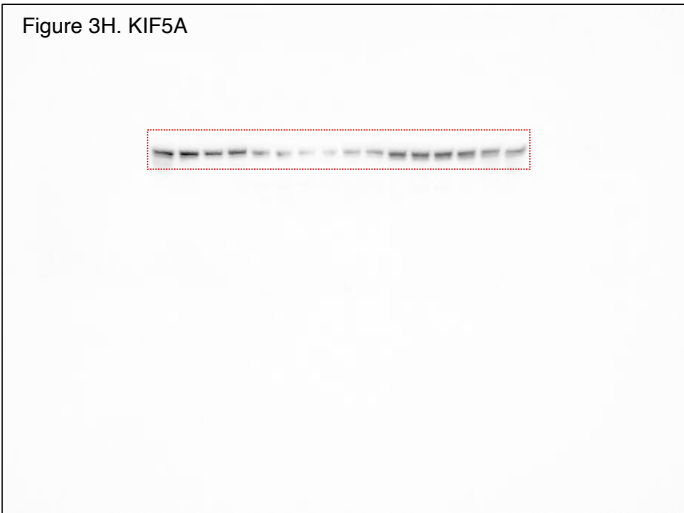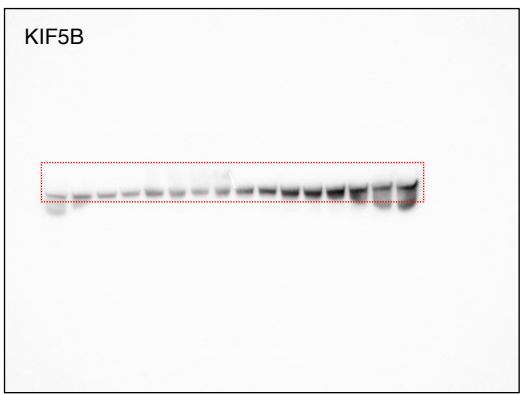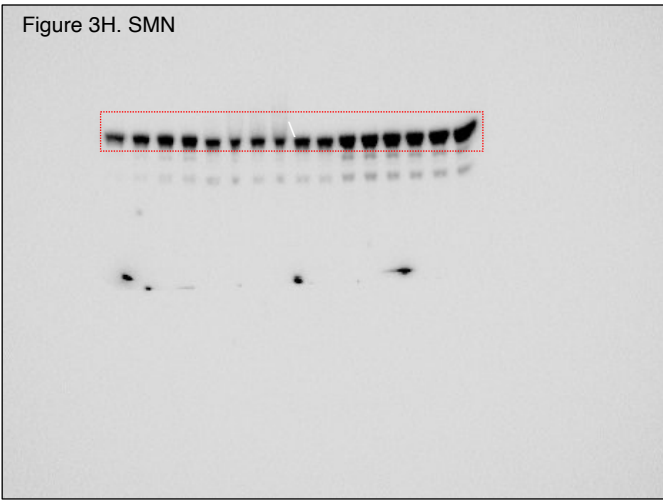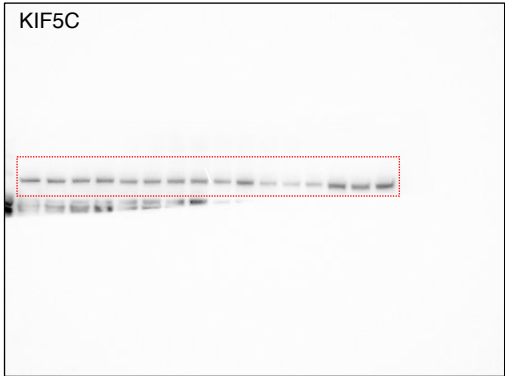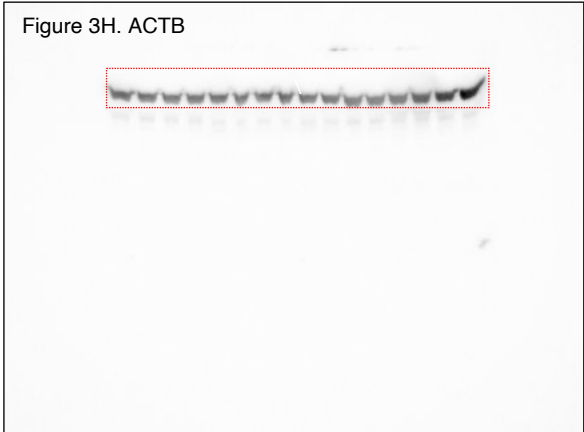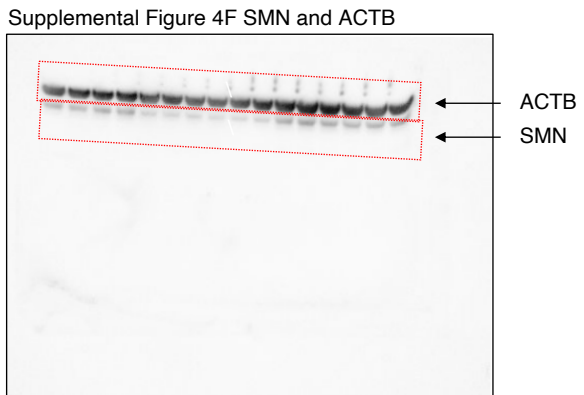

# Figure 5

Figure 5E

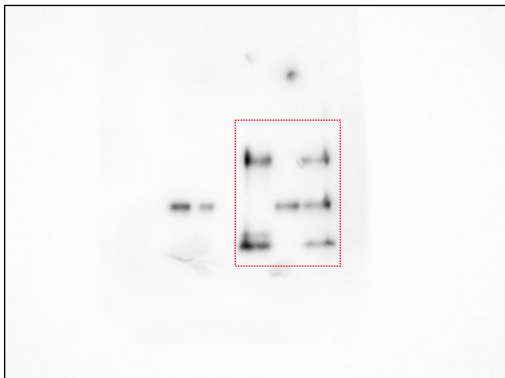

Figure 5H

Figure. SMN

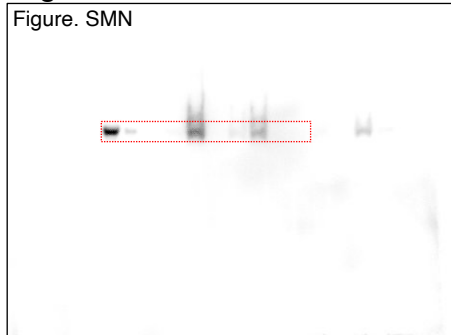

Figure. ACTB

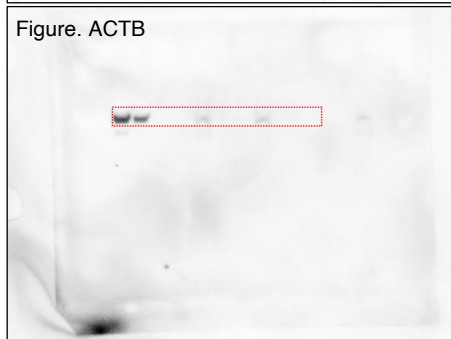

Figure. FUS

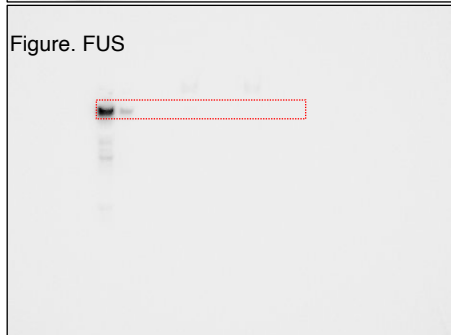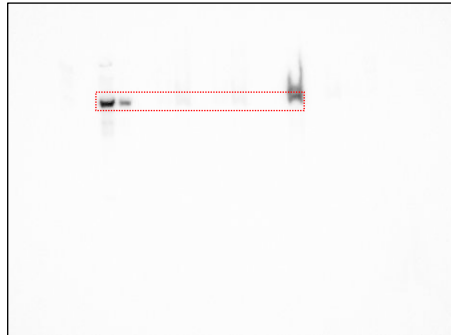

- 1. Stripping with Restore™ Western Blot Stripping Buffer Thermo Scientific™ 21059 10min
- 2. Blocking everyblot 1hr at RT
- 3. anti-ACTB antibody

- 1. Stripping with Restore™ Western Blot Stripping Buffer Thermo Scientific™ 21059 10min
- 2. Blocking everyblot 1hr at RT
- 3. anti-FUS antibody

- 1. Stripping with Restore™ Western Blot Stripping Buffer Thermo Scientific™ 21059 10min
- 2. Blocking everyblot 1hr at RT
- 3. anti-TDP-43 antibody

# Supplemental Figure 1B

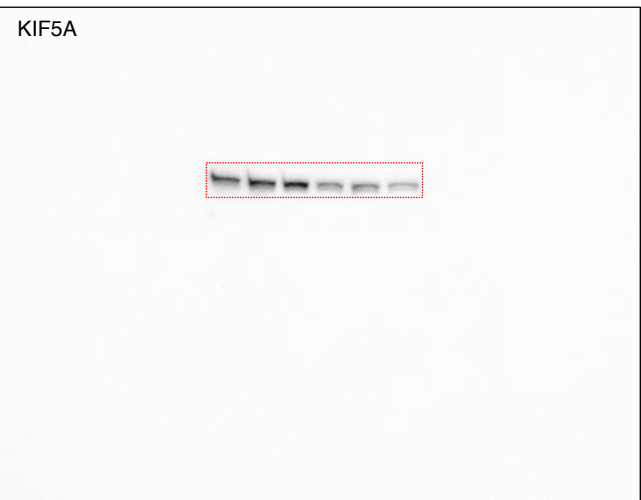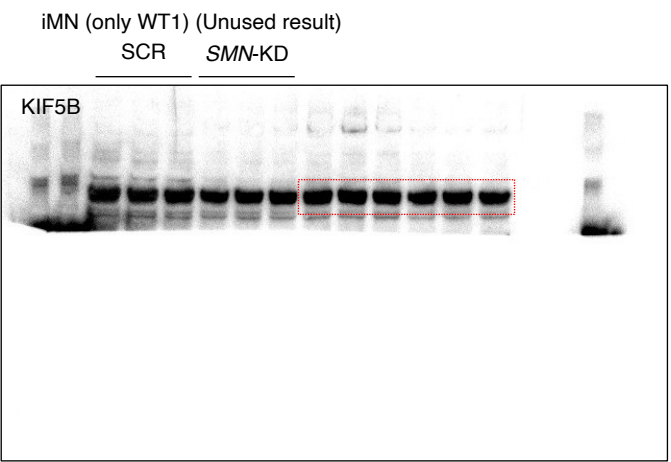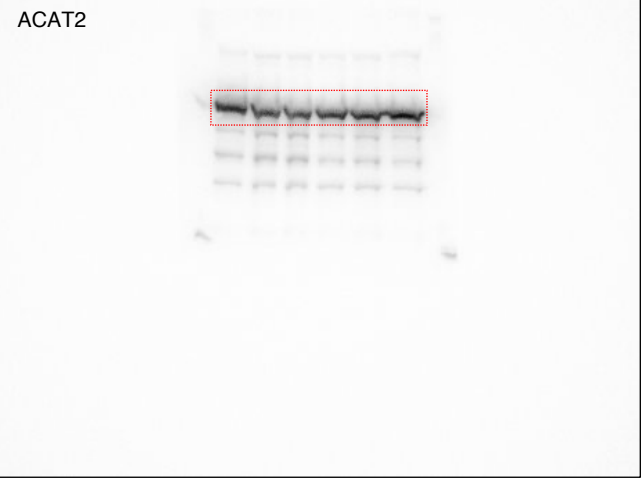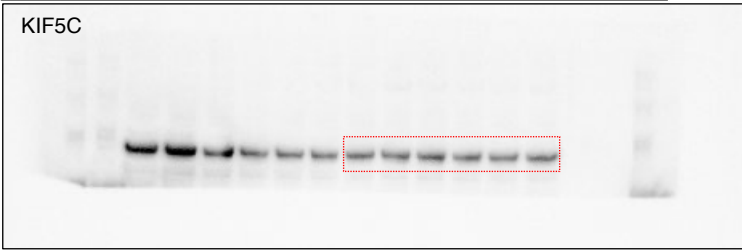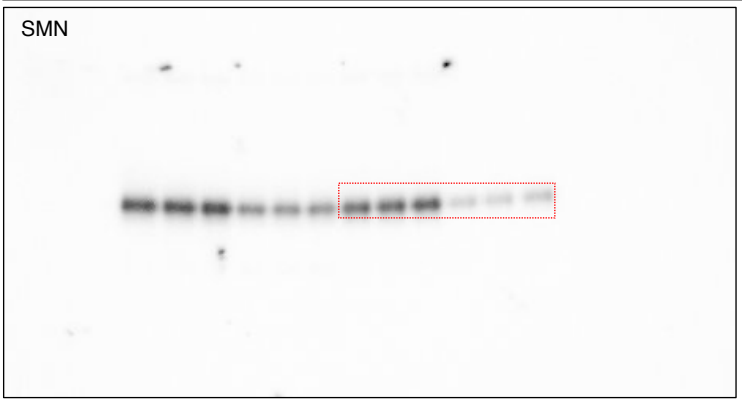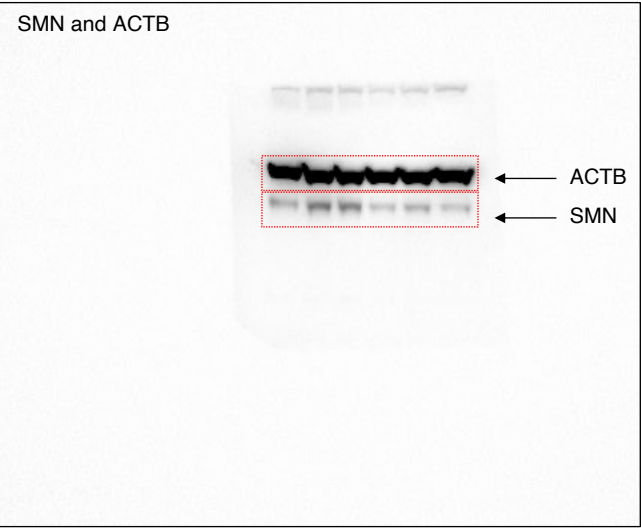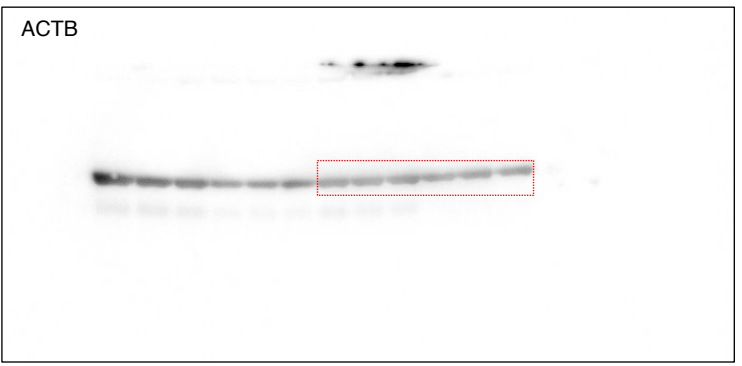

# Supplemental Figure 1E

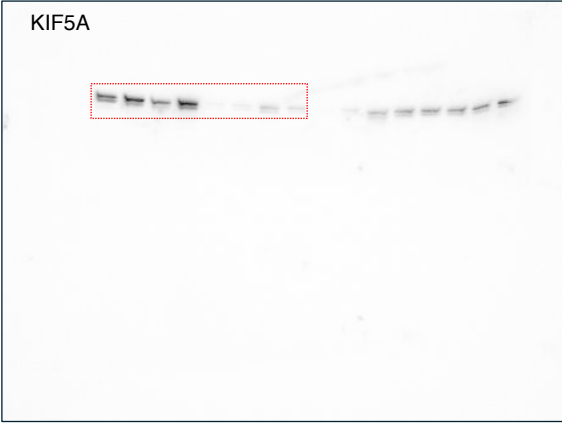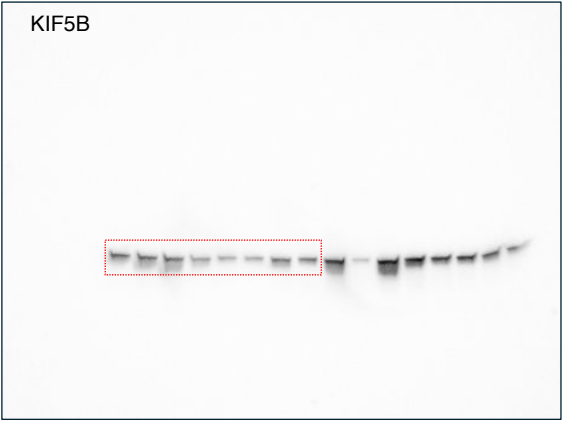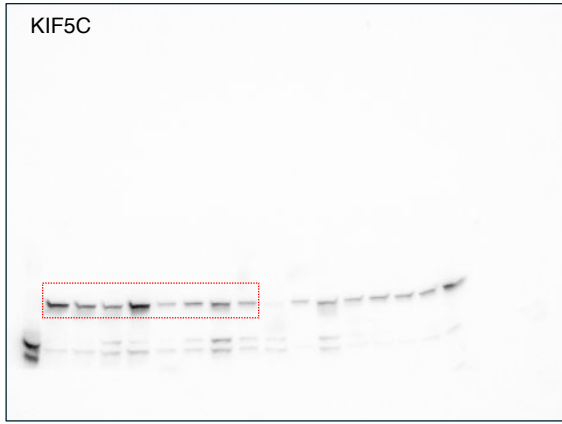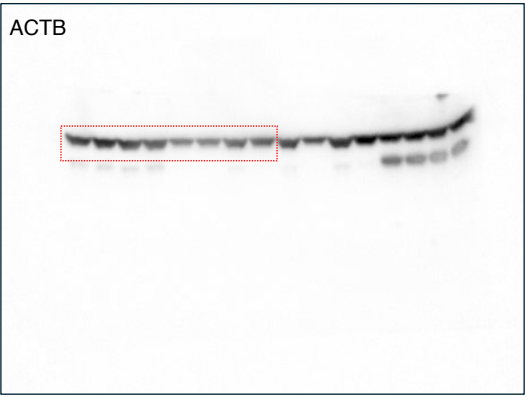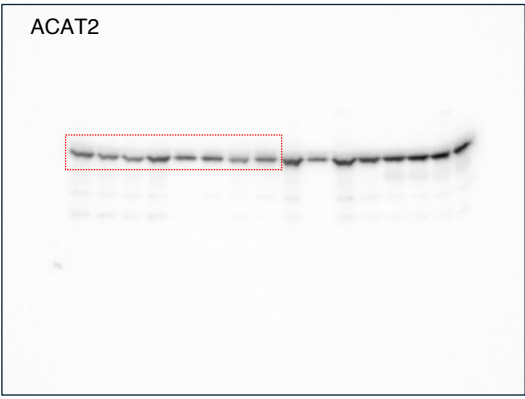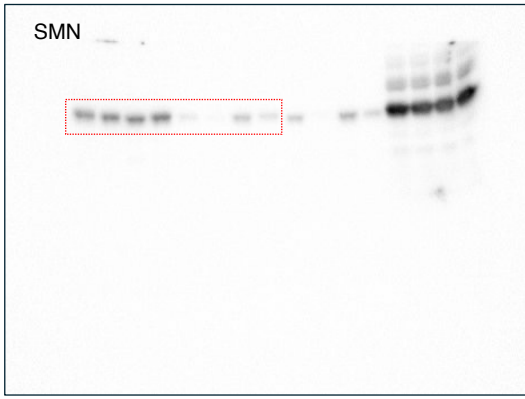

# Supplemental Figure 5

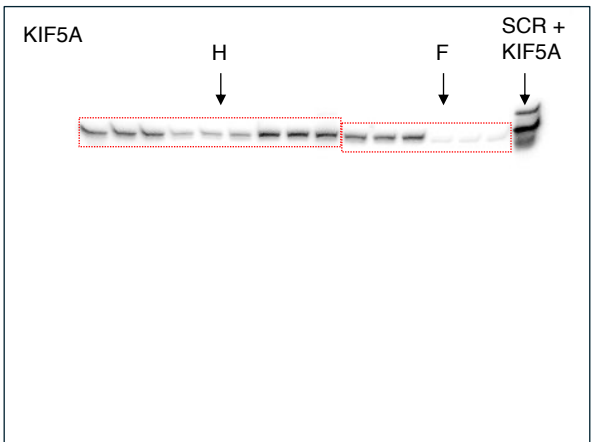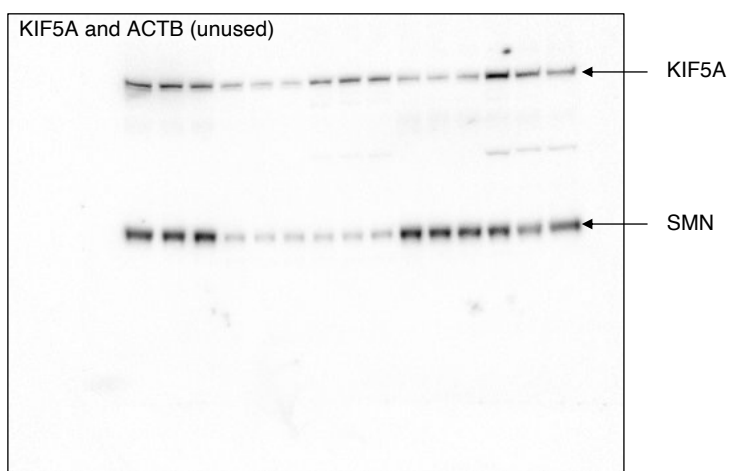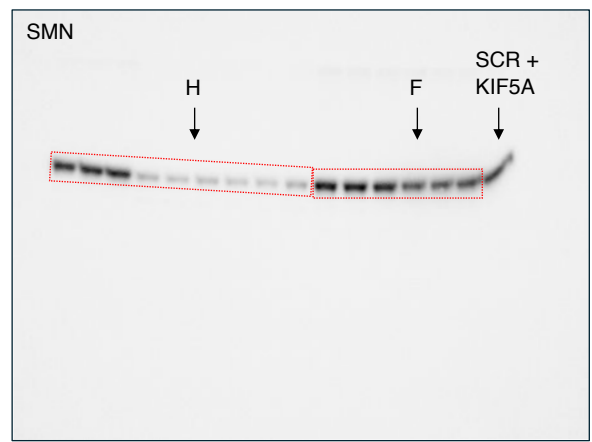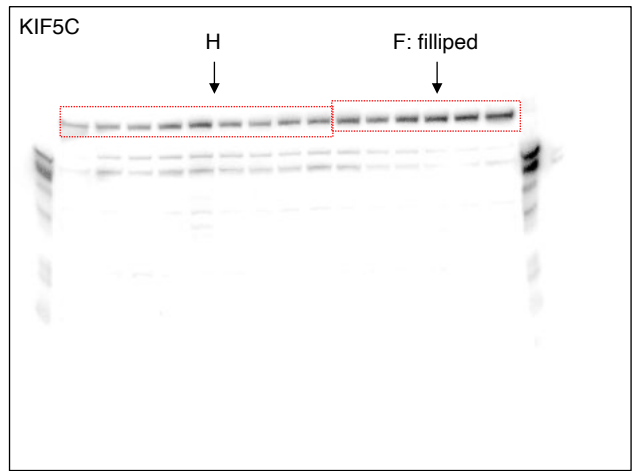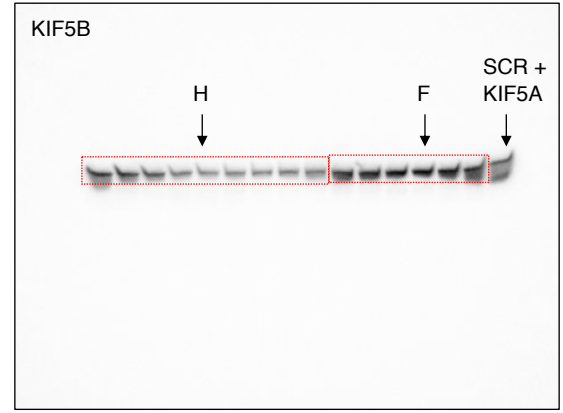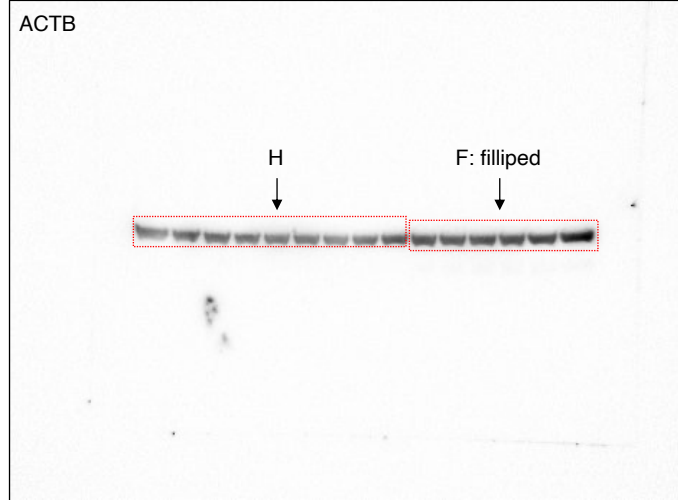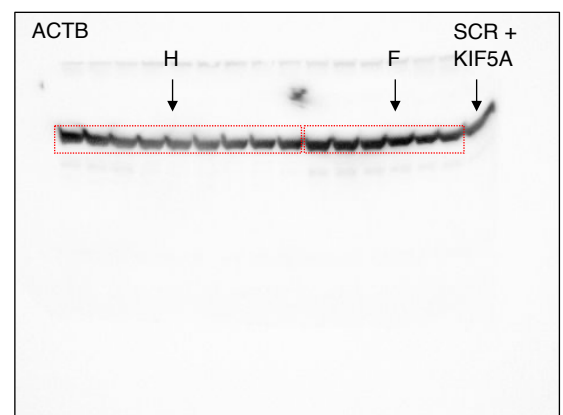

# Supplemental Figure 6B

SMN

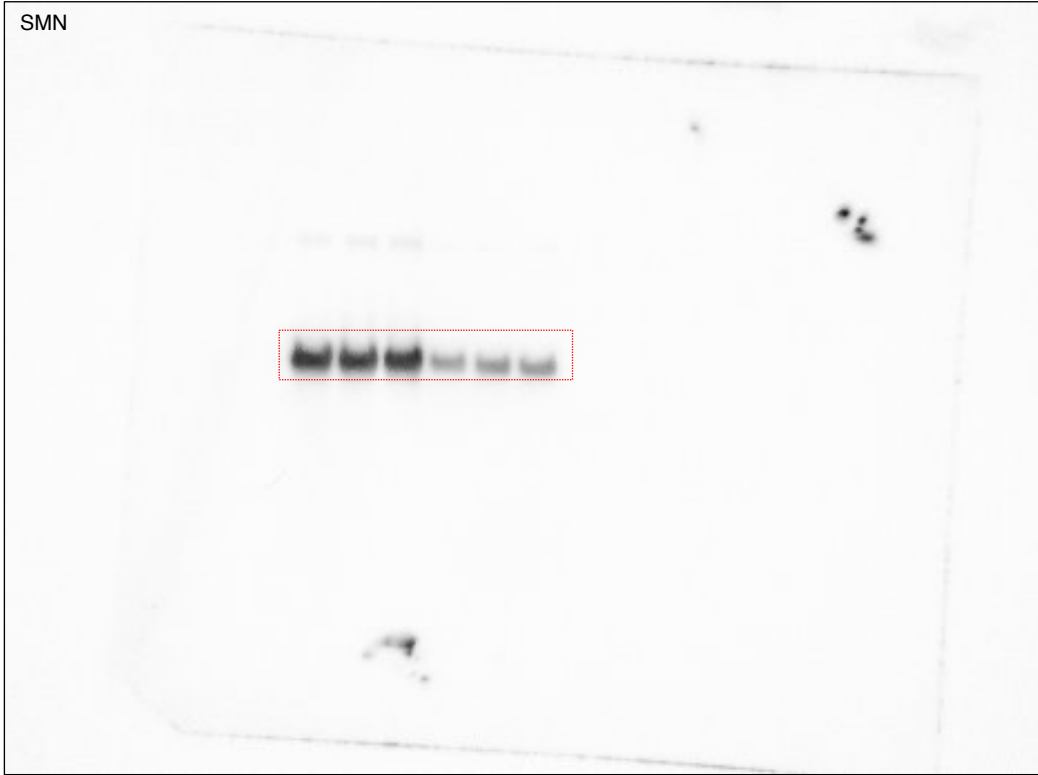

ACTB

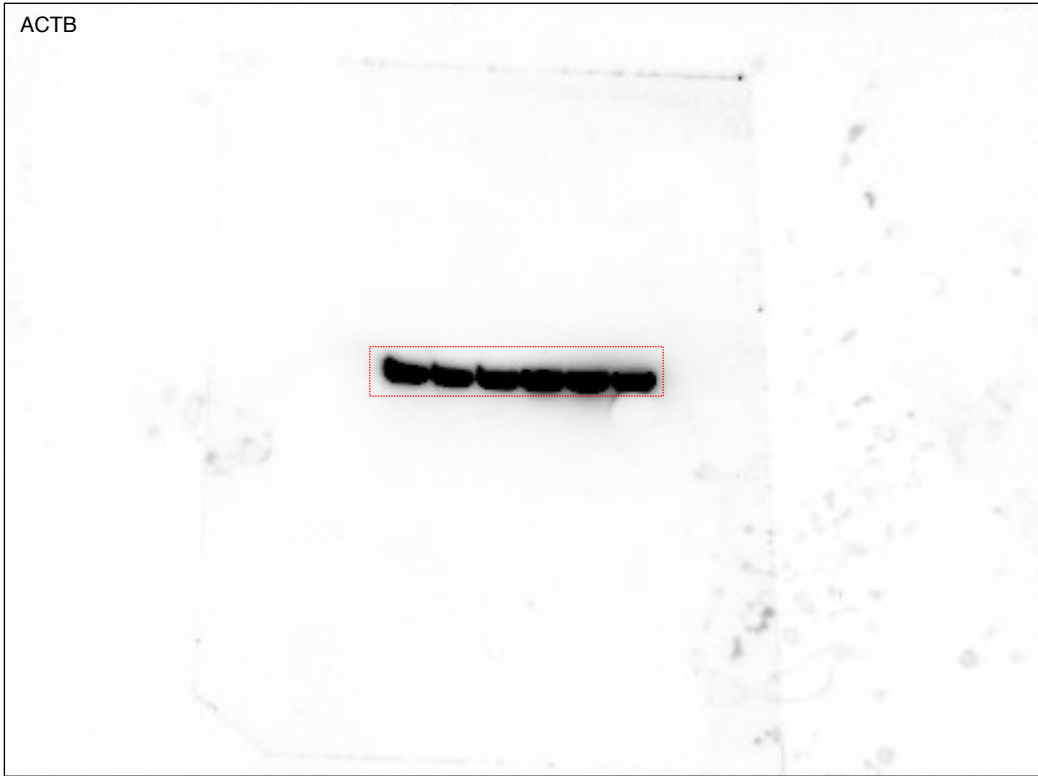

# Supplemental Figure 6

Supplemental Figure 6E

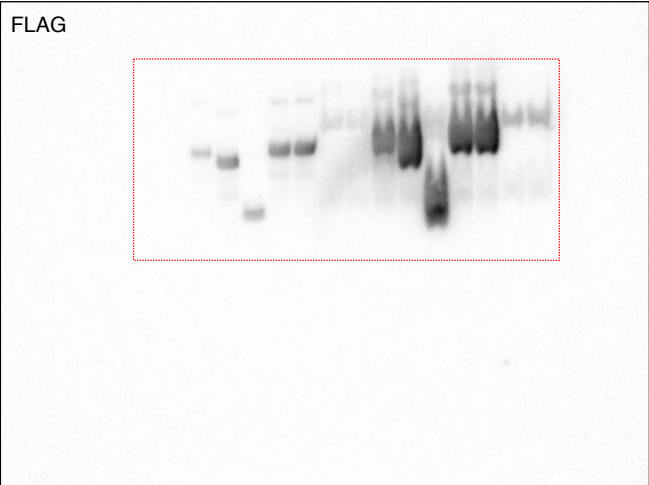

Supplemental Figure 6F

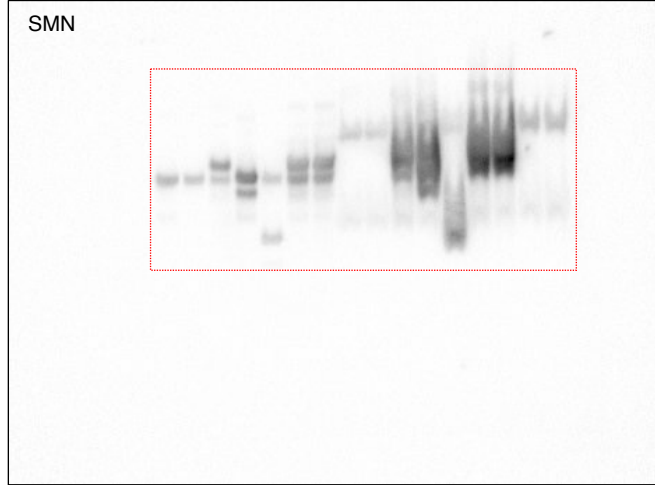

ACTB

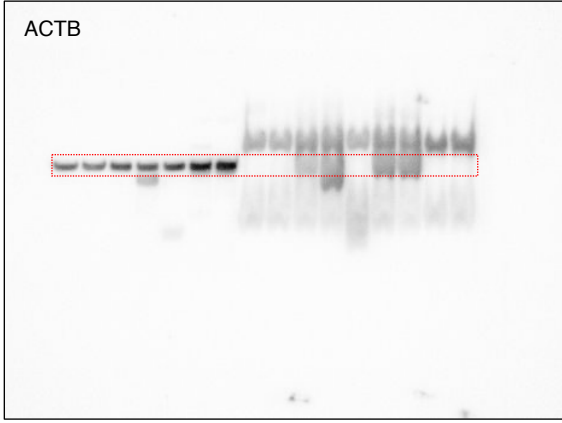

ACTB

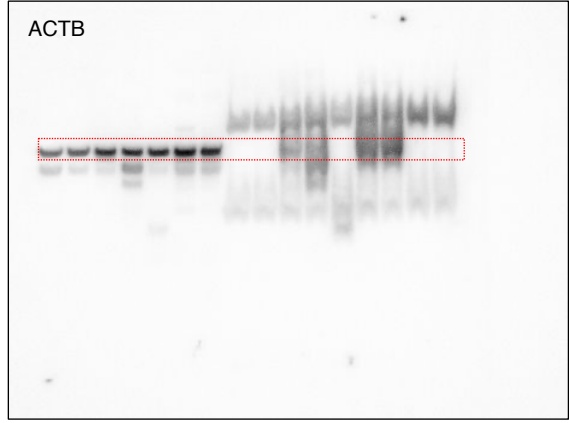

Supplement: sd2 [file 2]
